# Supplementary material for: Primary antibody deficiency-associated arthritis shares features with spondyloarthritis and enteropathic arthritis
Source: HighWire-hosted journal article supplement (doi:10.1136/rmdopen-2022-002664), 2022-12-01
Supplement: rmdopen-2022-002664supp001_data_supplement.pdf [file rmdopen-2022-002664supp001_data_supplement.pdf]

**Suppl. Table 1:** Association of infectious and non-infectious manifestations of PADs with inflammatory arthritis

| atopic disease             | arthritis<br>N=44 | no arthritis<br>N=224 | OR (95% CI)       | $p^1$       | $q^2$  |
|----------------------------|-------------------|-----------------------|-------------------|-------------|--------|
| atopic dermatitis - no (%) | 6 (13.64)         | 13 (5.8)              | 2.56 (0.92-7.16)  | 0.0992 (ns) | 0.0435 |
| allergic rhinitis - no (%) | 9 (20.45)         | 16 (7.14)             | 3.34 (1.37-8.16)  | 0.013 (*)   | 0.0457 |
| asthma - no (%)            | 4 (9.1)           | 6 (2.7)               | 3.63 (0.98-13.16) | 0.0629 (ns) | 0.0478 |
| other - no (%)             | 2 (4.54)          | 9 (4.02)              | 1.14 (0.24-5.46)  | 0.6982 (ns) | 0.0500 |

CI, confidence interval; N, total number; no, number; OR, odds ratio

<sup>1</sup>p < 0.05 \*; ns, non-significant

<sup>2</sup>p values were adjusted for Benjamini-Hochberg FDR, selected threshold of 5%. None of p values were considered "discoveries".

**Suppl. Table 2:** Independent association of atopic disease, enteropathy and splenomegaly with PAD-associated arthritis, evaluated through multivariable logistic regression

|                | coefficient | standard error | $p^1$          | AOR (95% CI)       |
|----------------|-------------|----------------|----------------|--------------------|
| atopic disease | 1.31        | 0.44           | 0.003 (**)     | 3.71 (1.56-8.79)   |
| enteropathies  | 2.41        | 0.41           | <0.0001 (****) | 11.12 (5.03-24.88) |
| splenomegaly   | 1.32        | 0.53           | 0.0124 (*)     | 3.76 (1.33-10.45)  |

AOR, adapted odds ratio

<sup>1</sup>p < 0.05 \*, p < 0.01 \*\* p < 0.0001 \*\*\*\*
